# Supplementary material for: Divergent functional isoforms drive niche specialisation for nutrient acquisition and use in rumen microbiome
Source: PubMed Central journal article supplement (PMC5364355; doi:10.1038/ismej.2016.172), 2017-01-13

Figure S2

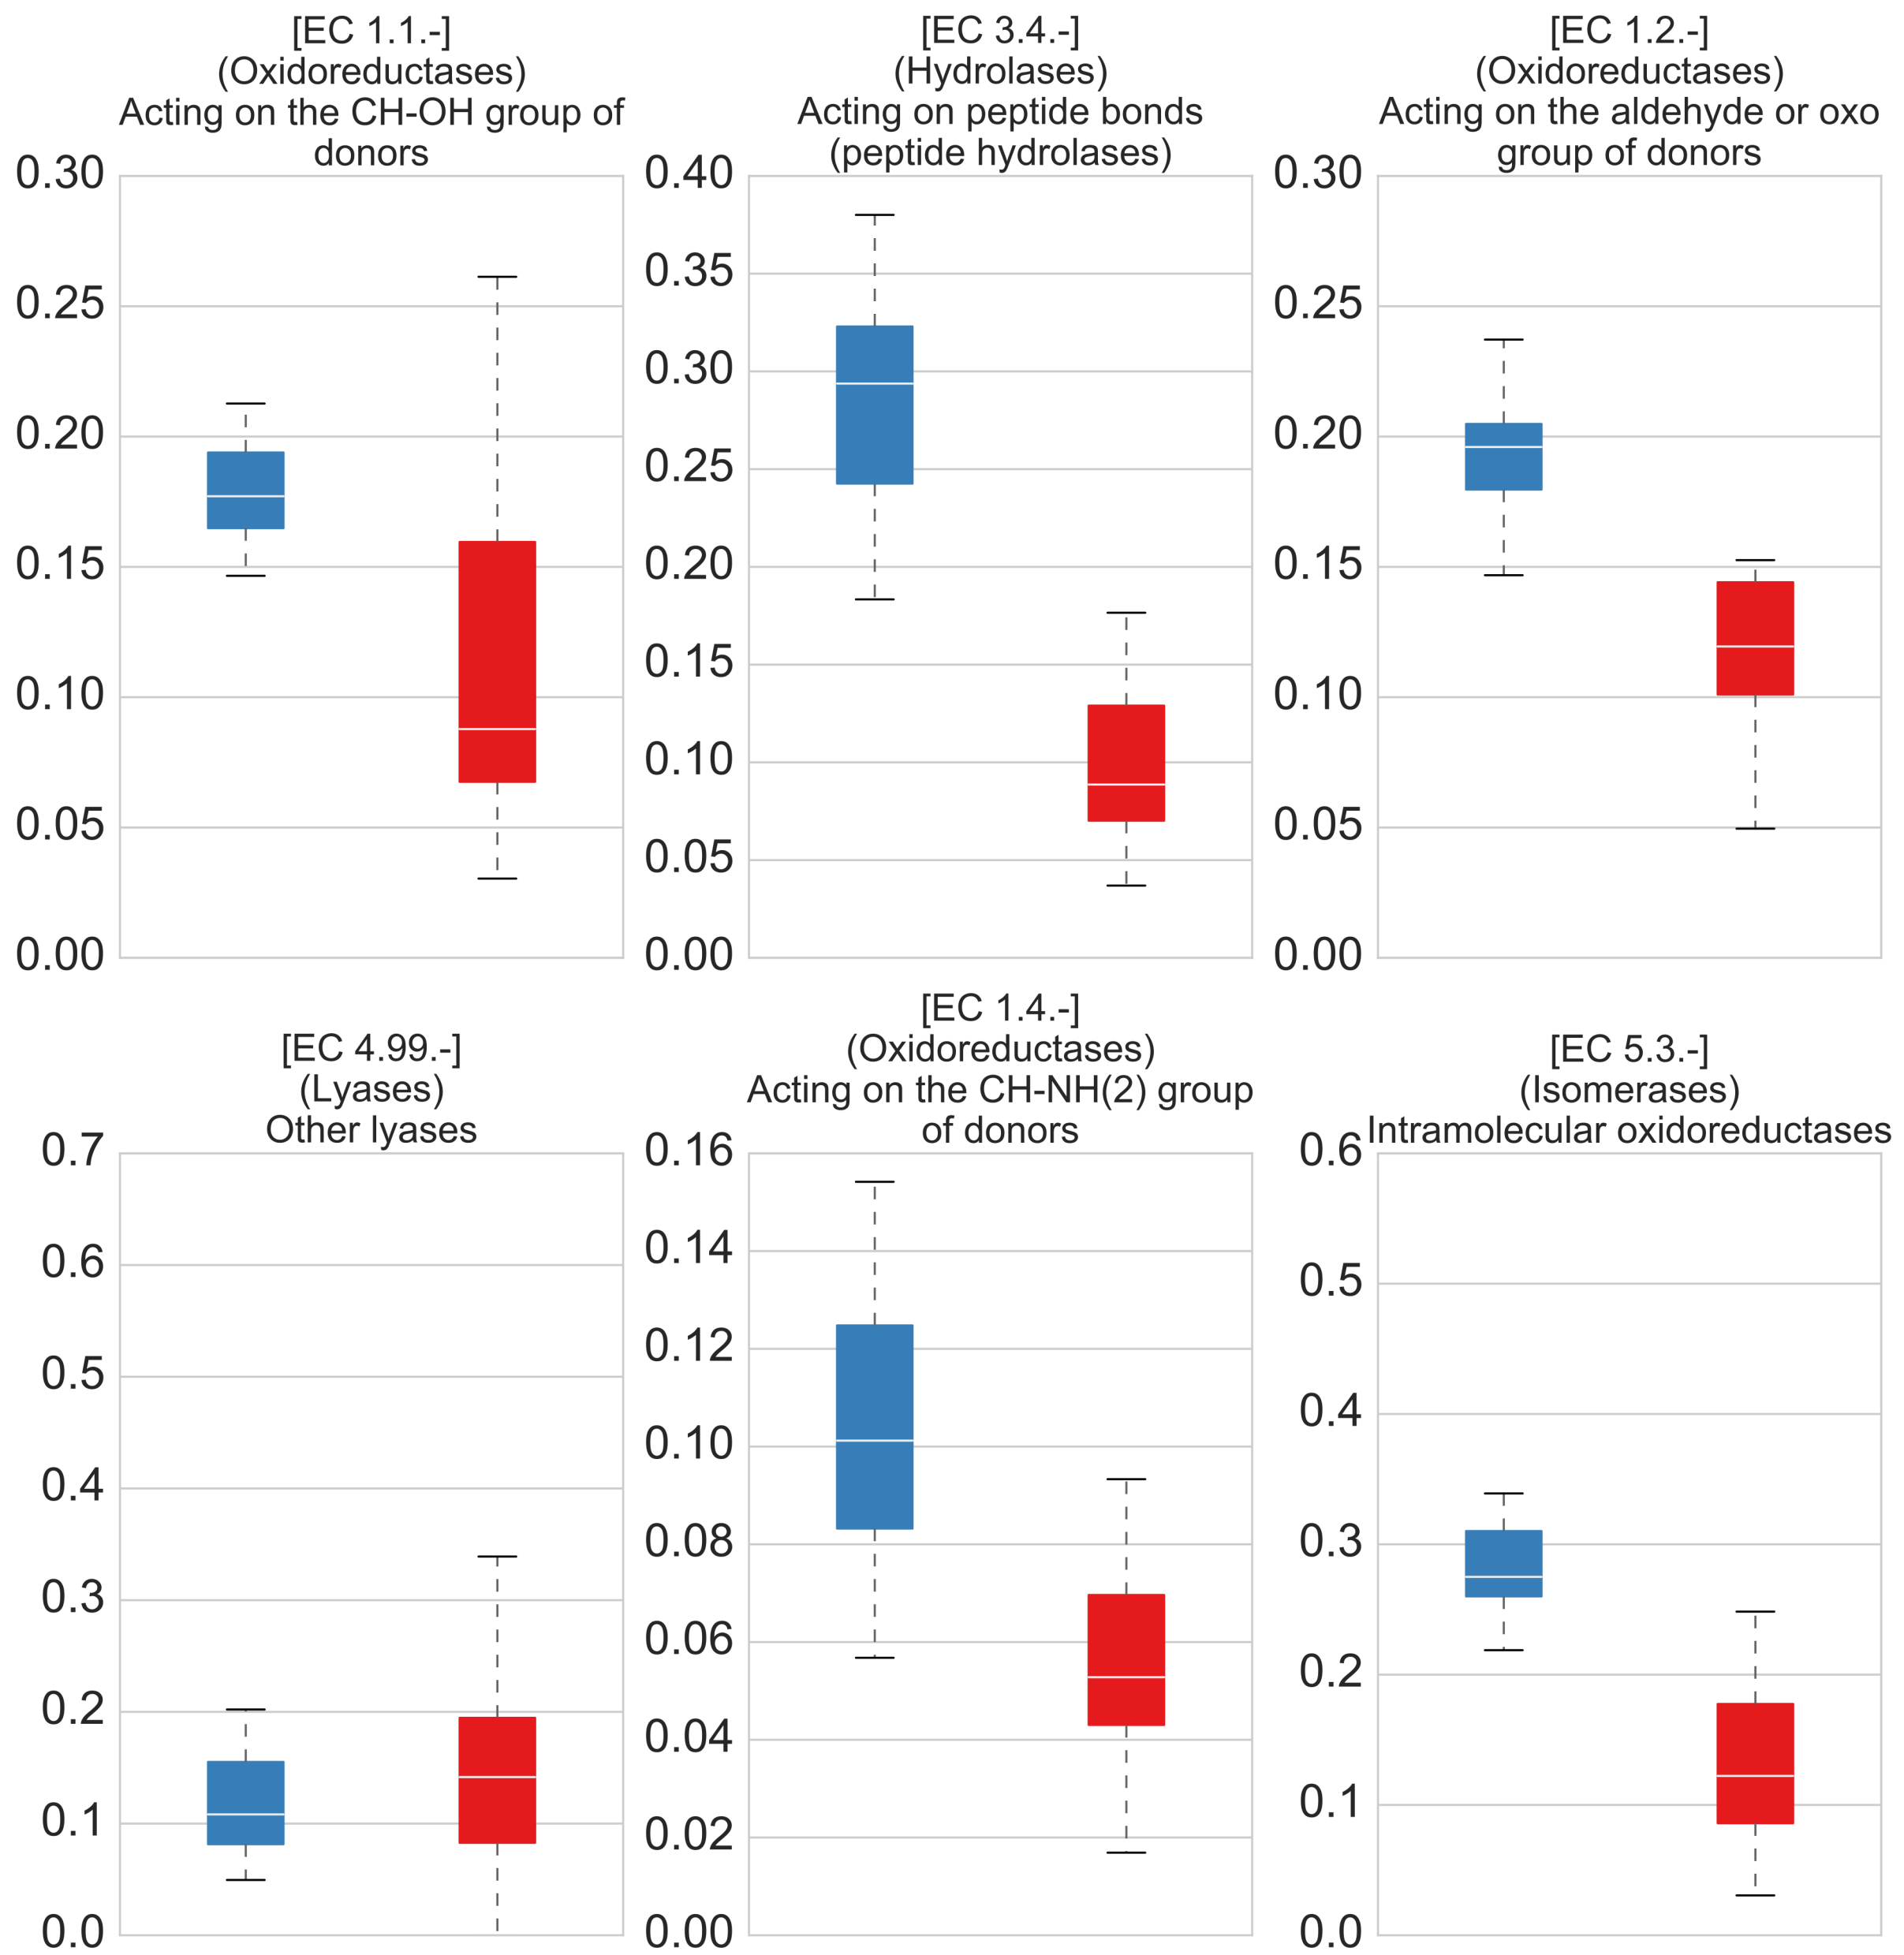

Supplement: ismej2016172x2.pdf [file ismej2016172x2.pdf]
